# Supplementary material for: Conversion of CO2 to epoxides or oxazolidinones enabled by a CuI/CuII-organic framework bearing a tri-functional linker
Source: Royal Society of Chemistry journal article supplement (doi:10.1039/d2qi01118b), 2022-01-01
Supplement: d2qi01118b1.pdf [file d2qi01118b1.pdf]

**Conversion of CO<sub>2</sub> to Epoxides or Oxazolidinones enabled  
by Mixed-Valence Cu<sup>I</sup>/Cu<sup>II</sup>-Organic Framework  
Constructed by Tri-functional Linker**

Ao-gang Liu,<sup>a</sup> Yuan Chen,<sup>a</sup> Peng-da Liu,<sup>a</sup> Wei Qi,<sup>a,\*</sup> Bao Li<sup>a,\*</sup>

<sup>a</sup> Key Laboratory of Material Chemistry for Energy Conversion and Storage,  
Semiconductor chemistry center, School of Chemistry and Chemical Engineering,  
Hubei Key Laboratory of Bioinorganic Chemistry&Materia Medica, Huazhong  
University of Science and Technology, Wuhan, Hubei 430074, People's Republic of  
China. Email: qiwei@hust.edu.cn; libao@hust.edu.cn

---

## Experimental section

### Materials and methods.

All starting chemicals were purchased from commercial sources and were used without further purification. The starting materials, tri-nuclear  $\text{Fe}_3\text{O}$  and hexacarboxyl ligands, had been synthesized according to the references.<sup>[1,2]</sup>

Thermogravimetric analysis (TGA) was performed on a Perkin-Elmer TG-7 analyzer heated from 25 to 800 °C under nitrogen atmosphere. Powder X-ray diffraction (PXRD) patterns for the as-synthesized samples were recorded on a X-ray diffraction meter (D/max 2500 PC, Rigaku) with  $\text{Cu-K}\alpha$  radiation (1.5406 Å). X-ray photoelectron spectroscopy (XPS) was carried out on a VGESCALBMKII X-ray photoelectron system with an Al  $\text{K}\alpha$  radiation (1486.6 eV).  $^1\text{H}$  NMR spectra was measured on Avance III400MHz.

### The synthesis of ligand $\text{H}_2\text{L}$

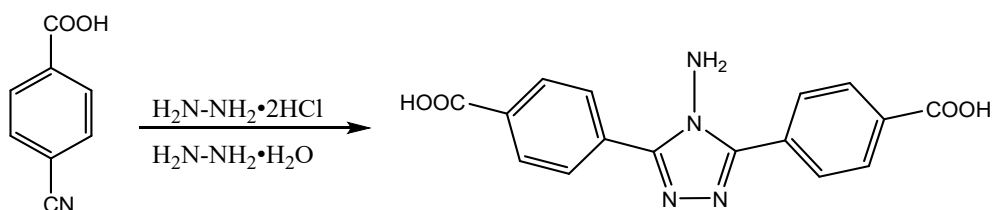

Fig. S1 The synthesis step of triazole dicarboxylic acid ligand

Put 4-cyanobenzoic acid (2.20 g, 15 mmol) and Hydrazine dihydrochloride (2.10 g, 20 mmol) in a 100 mL three-necked flask, evacuate for 10 min and pass argon gas, add 16 mL ethylene glycol and stir well, the solution is white. Add 2.5 mL of hydrazine hydrate slowly while stirring, and the solution gradually becomes colorless. 130 °C oil bath reaction for three days, the solution is milky white. After the reaction, cool slowly to room temperature, add 50 mL of deionized water, stir thoroughly and then filter under reduced pressure, and wash with deionized water several times. After drying, a milky white powder was obtained with a yield of 68.74%.  $^1\text{H}$  NMR: 12.81 ppm, 8.20 ppm, 8.12 ppm, 6.44 ppm (1:2:2:1).

---

### The synthesis of Cu-MOF

H<sub>2</sub>L 22 mg and 20 mg of cuprous iodide were added into a glass vial, 4 mL of N,N-dimethylformamide was slowly added with a pipette, 2 drops of tetrafluoroboric acid was added after ultrasonic homogenization, stirred well and then put into a polytetrafluoroethylene reactor and placed in an oven at 85 °C for three days, and green cubic crystalline samples were obtained after cooling to room temperature with a yield of about 42%, which were directly utilized as the other characterization and catalyst.

### The synthesis of alkynylamine substrates

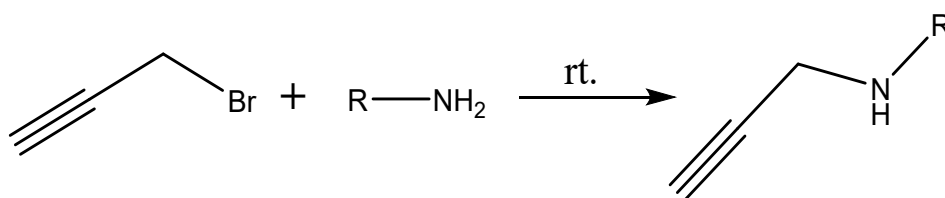

Fig. S2 Preparation of alkynylamine substrates containing different groups

Organic amine (162 mmol) with different substituent was put into a 100 mL round bottom flask and bromopropyne (27 mmol) was slowly added dropwise into it under the condition of ice water bath, stirred for 30 min, then slowly raised to room temperature and reacted at room temperature overnight. At the end of the reaction, 20 mL of ether was added to the obtained solution and diluted, and then extracted three times with 20 mL of saturated NaHCO<sub>3</sub>. The collected organic phase was dried with anhydrous Na<sub>2</sub>SO<sub>4</sub>, filtered and then the solution was concentrated under reduced pressure and separated by a chromatographic column to finally obtain the oily liquid product. Benzylamine,  $\beta$ -phenylethylamine, cyclohexylamine and isopropylamine with different substituents were prepared by the same method.

### X-Ray Structural Determination

Diffraction data for Cu-MOF (HUST-23) (0.3 × 0.2 × 0.2 mm) was collected via Bruker Venture using Cu-K $\alpha$  ( $\lambda = 1.54178 \text{ \AA}$ ) radiation at 100 K. The structures of complexes were solved by direct methods, and the non-hydrogen atoms were located from the trial structure and then refined anisotropically with SHELXTL using a full-

---

matrix leastsquares procedure based on  $F^2$  values. The hydrogen atom positions were fixed geometrically at calculated distances and allowed to ride on the parent atoms. Attempts to define the highly disordered solvent molecules were unsuccessful, so the structure was refined with the PLATON “SQUEEZE” procedure. CCDC-2174292 for the data under different temperature contain the supplementary crystallographic data for this paper. These data can be obtained free of charge from The Cambridge Crystallographic Data Centre via <http://www.ccdc.cam.ac.uk/datarequest/cif>.

### **The related catalytic experiments with CO<sub>2</sub>**

Before the catalysis experiments, Cu-MOF was soaked in CH<sub>3</sub>CN, and fresh CH<sub>3</sub>CN was changed every 12 hours, and soaked for three days. Then filtered and dried at 60 °C to remove the solvent molecules. In a general experiment, 0.057 mmol catalyst based on Cu and 1.3 mmol substrate were added to a glass reaction tube with a CO<sub>2</sub> balloon and sealed the reactor. Subsequently, placed the glass reaction tube in a water bath at 30 °C and stirred magnetically for 1 h. After the reaction, the catalyst was separated by centrifugation, and the mixed solution after the reaction with 1,3,5-trimethoxybenzene as the internal standard was analyzed by <sup>1</sup>H NMR.

### **The cycling catalytic experiments with CO<sub>2</sub>**

Before the catalysis experiments, Cu-MOF was soaked in CH<sub>3</sub>CN, and fresh CH<sub>3</sub>CN was changed every 12 hours, and soaked for three days. Then filtered and dried at 60 °C to remove the solvent molecules. In a general experiment, 0.057 mmol catalyst based on Cu and 1.3 mmol substrate were added to a glass reaction tube with a CO<sub>2</sub> balloon and sealed the reactor. Subsequently, placed the glass reaction tube in a water bath at 30 °C and stirred magnetically for 1 h. After 1 hour, the mixture in the tube was separated by centrifugation, and the liquid was calculated the product yield by <sup>1</sup>H NMR, and the solid was transferred to a new tube. Then, the next cycle of experiments was operated as the initial run. As Figure S13 shown, the catalyst can be recycled at least five times and its catalytic activity is not significantly reduced. The little reduction of the reaction yield was caused by the loss of small amounts of the

catalyst.

**Table S1** Crystal parameters of Cu-MOF

| Empirical formula                                            | C <sub>38</sub> H <sub>38</sub> Cu <sub>6</sub> I <sub>4</sub> N <sub>10</sub> O <sub>12</sub> |
|--------------------------------------------------------------|------------------------------------------------------------------------------------------------|
| Formula weight                                               | 1715.69                                                                                        |
| Temperature/K                                                | 100                                                                                            |
| Crystal system                                               | trigonal                                                                                       |
| Space group                                                  | <i>R</i> -3 <i>c</i>                                                                           |
| <i>a</i> /Å                                                  | 35.9116(4)                                                                                     |
| <i>b</i> /Å                                                  | 35.9116(4)                                                                                     |
| <i>c</i> /Å                                                  | 87.2194(16)                                                                                    |
| <i>α</i> /°                                                  | 90                                                                                             |
| <i>β</i> /°                                                  | 90                                                                                             |
| <i>γ</i> /°                                                  | 120                                                                                            |
| Volume/Å <sup>3</sup>                                        | 97412(3)                                                                                       |
| <i>Z</i>                                                     | 36                                                                                             |
| $\rho_{\text{calc}}/\text{cm}^3$                             | 1.029                                                                                          |
| $\mu/\text{mm}^{-1}$                                         | 10.511                                                                                         |
| <i>F</i> (000)                                               | 28081.0                                                                                        |
| Crystal size/mm <sup>3</sup>                                 | 0.3 × 0.2 × 0.2                                                                                |
| Radiation                                                    | CuK $\alpha$ ( $\lambda$ = 1.54184)                                                            |
| 2 $\theta$ range for data collection/°                       | 4.922 to 145.318                                                                               |
| Reflections collected                                        | 21330                                                                                          |
| Independent reflections                                      | 21330 [ <i>R</i> <sub>int</sub> = 0.0701, <i>R</i> <sub>sigma</sub> = 0.0323]                  |
| Data/restraints/parameters                                   | 21330/0/639                                                                                    |
| Goodness-of-fit on <i>F</i> <sup>2</sup>                     | 1.052                                                                                          |
| Final <i>R</i> indexes [ <i>I</i> ≥ 2 $\sigma$ ( <i>I</i> )] | <i>R</i> <sub>1</sub> = 0.0701, <i>wR</i> <sub>2</sub> = 0.1978                                |
| Final <i>R</i> indexes [all data]                            | <i>R</i> <sub>1</sub> = 0.0781, <i>wR</i> <sub>2</sub> = 0.2056                                |
| Largest diff. peak/hole / e Å <sup>-3</sup>                  | 3.36/-1.79                                                                                     |

**Table S2** The selected bond length of Cu-MOF

| Atom | Atom | Length/Å   | Atom | Atom | Length/Å |
|------|------|------------|------|------|----------|
| I1   | Cu4  | 2.5917(10) | N7   | N6   | 1.380(7) |
| I1   | Cu3  | 2.5782(12) | N2   | N3   | 1.384(7) |

| Atom | Atom             | Length/Å   | Atom | Atom              | Length/Å   |
|------|------------------|------------|------|-------------------|------------|
| I2   | Cu4              | 2.7829(12) | N1   | N4                | 1.420(9)   |
| I2   | Cu3              | 2.6476(12) | Cu1  | Cu1 <sup>4</sup>  | 2.6243(15) |
| I2   | Cu2              | 2.6898(13) | Cu1  | O4 <sup>4</sup>   | 1.967(4)   |
| I3   | Cu4              | 2.7251(12) | Cu1  | O2 <sup>5</sup>   | 1.956(4)   |
| I3   | Cu2              | 2.7367(14) | Cu1  | O1 <sup>6</sup>   | 1.947(4)   |
| I3   | Cu5              | 2.6488(17) | Cu1  | O3                | 1.939(4)   |
| I4   | Cu2              | 2.6340(11) | Cu1  | O12               | 2.119(4)   |
| I4   | Cu5              | 2.5245(16) | Cu4  | Cu3               | 2.5761(14) |
| Cu6  | Cu6 <sup>1</sup> | 2.6136(16) | Cu4  | Cu2               | 2.8225(14) |
| Cu6  | O5 <sup>2</sup>  | 1.954(4)   | Cu4  | N6                | 2.032(6)   |
| Cu6  | O6 <sup>3</sup>  | 1.962(4)   | Cu3  | N2                | 2.033(6)   |
| Cu6  | O8               | 1.947(4)   | Cu2  | Cu5               | 2.5824(19) |
| Cu6  | O7 <sup>1</sup>  | 1.968(4)   | Cu2  | N3                | 2.017(6)   |
| Cu6  | O10              | 2.106(5)   | Cu5  | N7                | 2.009(6)   |
| Cu3  | O11              | 2.096(6)   | Cu5  | O9                | 2.429(6)   |
| O5   | Cu6 <sup>7</sup> | 1.954(4)   | O2   | Cu1 <sup>9</sup>  | 1.955(4)   |
| O5   | C24              | 1.259(7)   | O1   | Cu1 <sup>10</sup> | 1.947(4)   |
| O6   | Cu6 <sup>8</sup> | 1.962(4)   | O7   | Cu6 <sup>1</sup>  | 1.968(4)   |
| O4   | Cu1 <sup>4</sup> | 1.967(4)   | N5   | N8                | 1.417(9)   |

Symmetry code: <sup>1</sup>1/3-Y+X, 2/3-Y, 7/6-Z; <sup>2</sup>-2/3+Y, -1/3+X, 7/6-Z; <sup>3</sup>+Y-X, 1-X, +Z; <sup>4</sup>2/3-X, 1/3-Y, 4/3-Z; <sup>5</sup>-1/3+Y, 1/3-X+Y, 4/3-Z; <sup>6</sup>1-Y, +X-Y, +Z; <sup>7</sup>1/3+Y, 2/3+X, 7/6-Z; <sup>8</sup>1-Y, 1+X-Y, +Z; <sup>9</sup>2/3-Y+X, 1/3+X, 4/3-Z; <sup>10</sup>1+Y-X, 1-X, +Z

**Table S3 Selected bond angle of Cu-MOF**

| Atom | Atom | Atom | Angle/°  | Atom | Atom | Atom | Angle/°    |
|------|------|------|----------|------|------|------|------------|
| Cu3  | I1   | Cu4  | 59.77(3) | N6   | N7   | Cu5  | 117.0(4)   |
| Cu3  | I2   | Cu4  | 56.57(3) | N7   | N6   | Cu4  | 116.5(4)   |
| Cu3  | I2   | Cu2  | 76.02(3) | N3   | N2   | Cu3  | 119.6(5)   |
| Cu2  | I2   | Cu4  | 62.07(3) | N2   | N3   | Cu2  | 116.3(4)   |
| Cu4  | I3   | Cu2  | 62.23(3) | N3   | Cu2  | I4   | 128.78(15) |
| Cu5  | I3   | Cu4  | 73.11(4) | N3   | Cu2  | Cu4  | 104.11(15) |
| Cu5  | I3   | Cu2  | 57.28(5) | N3   | Cu2  | Cu5  | 153.9(2)   |

| Atom            | Atom | Atom             | Angle/°    | Atom | Atom | Atom             | Angle/°    |
|-----------------|------|------------------|------------|------|------|------------------|------------|
| Cu5             | I4   | Cu2              | 60.04(4)   | O3   | Cu1  | O1 <sup>6</sup>  | 87.8(2)    |
| O5 <sup>1</sup> | Cu6  | Cu6 <sup>2</sup> | 84.04(13)  | O3   | Cu1  | O12              | 100.2(2)   |
| O5 <sup>1</sup> | Cu6  | O6 <sup>3</sup>  | 88.67(19)  | O12  | Cu1  | Cu1 <sup>4</sup> | 172.82(14) |
| O5 <sup>1</sup> | Cu6  | O7 <sup>2</sup>  | 89.28(19)  | I1   | Cu4  | I2               | 111.35(4)  |
| O5 <sup>1</sup> | Cu6  | O10              | 93.90(19)  | I1   | Cu4  | I3               | 108.93(4)  |
| O6 <sup>3</sup> | Cu6  | Cu6 <sup>2</sup> | 84.62(13)  | I1   | Cu4  | Cu2              | 127.43(5)  |
| O6 <sup>3</sup> | Cu6  | O7 <sup>2</sup>  | 168.73(19) | I2   | Cu4  | Cu2              | 57.35(4)   |
| O6 <sup>3</sup> | Cu6  | O10              | 97.6(2)    | I3   | Cu4  | I2               | 116.32(4)  |
| O8              | Cu6  | Cu6 <sup>2</sup> | 84.08(13)  | I3   | Cu4  | Cu2              | 59.09(3)   |
| O8              | Cu6  | O5 <sup>1</sup>  | 168.04(19) | Cu3  | Cu4  | I1               | 59.85(3)   |
| O8              | Cu6  | O6 <sup>3</sup>  | 88.89(18)  | Cu3  | Cu4  | I2               | 59.06(4)   |
| O8              | Cu6  | O7 <sup>2</sup>  | 90.84(18)  | Cu3  | Cu4  | I3               | 107.34(4)  |
| O8              | Cu6  | O10              | 98.02(19)  | Cu3  | Cu4  | Cu2              | 74.86(4)   |
| O7 <sup>2</sup> | Cu6  | Cu6 <sup>2</sup> | 84.15(14)  | N6   | Cu4  | I1               | 125.21(14) |
| O7 <sup>2</sup> | Cu6  | O10              | 93.6(2)    | N6   | Cu4  | I2               | 93.02(18)  |
| O10             | Cu6  | Cu6 <sup>2</sup> | 176.92(15) | N6   | Cu4  | I3               | 101.66(17) |
| O4 <sup>4</sup> | Cu1  | Cu1 <sup>4</sup> | 82.04(14)  | N6   | Cu4  | Cu3              | 146.40(19) |
| O4 <sup>4</sup> | Cu1  | O12              | 91.8(2)    | N6   | Cu4  | Cu2              | 107.20(14) |
| O2 <sup>5</sup> | Cu1  | Cu1 <sup>4</sup> | 83.37(14)  | I1   | Cu3  | I2               | 116.33(4)  |
| O2 <sup>5</sup> | Cu1  | O4 <sup>4</sup>  | 88.9(2)    | Cu4  | Cu3  | I1               | 60.37(3)   |
| O2 <sup>5</sup> | Cu1  | O12              | 92.79(19)  | Cu4  | Cu3  | I2               | 64.36(4)   |
| O1 <sup>6</sup> | Cu1  | Cu1 <sup>4</sup> | 84.87(14)  | N2   | Cu3  | I1               | 121.59(19) |
| O1 <sup>6</sup> | Cu1  | O4 <sup>4</sup>  | 90.2(2)    | N2   | Cu3  | I2               | 102.34(16) |
| O1 <sup>6</sup> | Cu1  | O2 <sup>5</sup>  | 168.2(2)   | N2   | Cu3  | Cu4              | 106.98(17) |
| O1 <sup>6</sup> | Cu1  | O12              | 98.98(19)  | N2   | Cu3  | O11              | 102.4(3)   |
| O3              | Cu1  | Cu1 <sup>4</sup> | 85.99(14)  | O11  | Cu3  | I1               | 108.0(2)   |
| O3              | Cu1  | O4 <sup>4</sup>  | 168.00(19) | O11  | Cu3  | I2               | 104.1(2)   |
| O3              | Cu1  | O2 <sup>5</sup>  | 90.7(2)    | O11  | Cu3  | Cu4              | 150.1(2)   |
| I4              | Cu5  | I3               | 111.05(5)  | I4   | Cu2  | Cu4              | 126.82(5)  |
| I4              | Cu5  | Cu2              | 62.09(4)   | Cu5  | Cu2  | I2               | 98.80(5)   |
| Cu2             | Cu5  | I3               | 63.07(4)   | Cu5  | Cu2  | I3               | 59.65(5)   |

| Atom | Atom | Atom | Angle/°    | Atom | Atom | Atom | Angle/°    |
|------|------|------|------------|------|------|------|------------|
| N7   | Cu5  | I3   | 104.56(17) | Cu5  | Cu2  | I4   | 57.88(4)   |
| N7   | Cu5  | I4   | 133.4(2)   | Cu5  | Cu2  | Cu4  | 72.49(4)   |
| N7   | Cu5  | Cu2  | 112.97(17) | N3   | Cu2  | I2   | 101.75(18) |
| I2   | Cu2  | I3   | 119.14(4)  | N3   | Cu2  | I3   | 95.96(19)  |
| I2   | Cu2  | Cu4  | 60.59(3)   | N7   | Cu5  | O9   | 100.7(2)   |

Symmetry code:  $^1-2/3+Y, -1/3+X, 7/6-Z$ ;  $^21/3-Y+X, 2/3-Y, 7/6-Z$ ;  $^3+Y-X, 1-X, +Z$ ;  $^42/3-X, 1/3-Y, 4/3-Z$ ;  $^5-1/3+Y, 1/3-X+Y, 4/3-Z$ ;  $^61-Y, +X-Y, +Z$ ;  $^71/3+Y, 2/3+X, 7/6-Z$ ;  $^81-Y, 1+X-Y, +Z$ ;  $^92/3-Y+X, 1/3+X, 4/3-Z$ ;  $^{10}1+Y-X, 1-X, +Z$

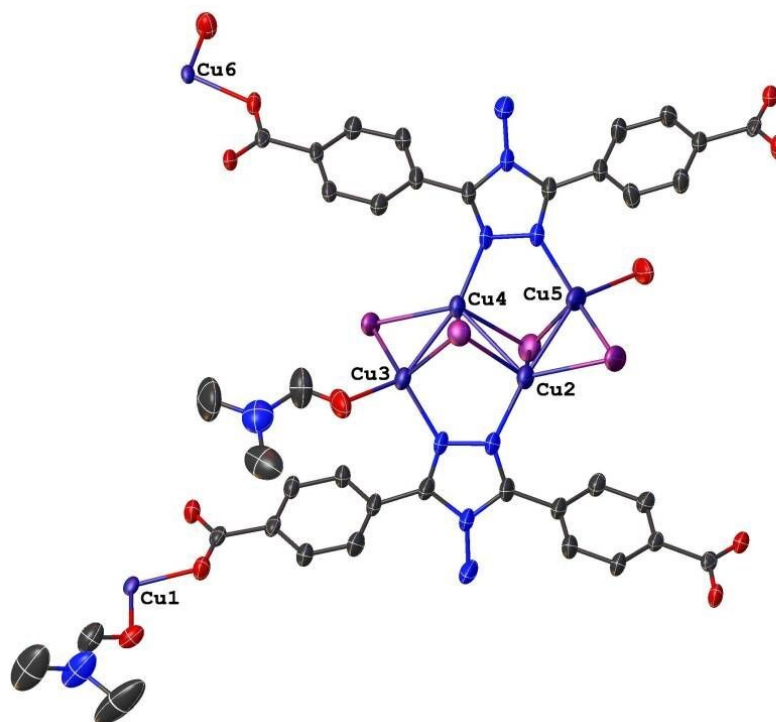

Fig. S1 asymmetric unit of Cu-MOF



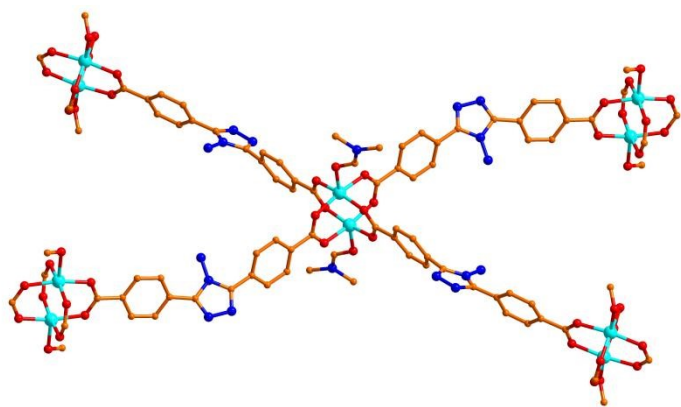

Fig. S2 view of the connection mode of Cu<sub>2</sub> cluster

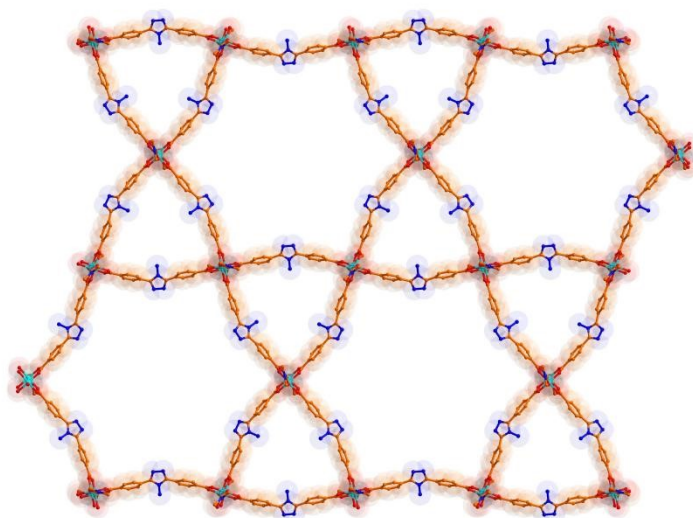

Fig. S3 view of the 2D structure consisting of Cu<sub>2</sub> cluster and ligand

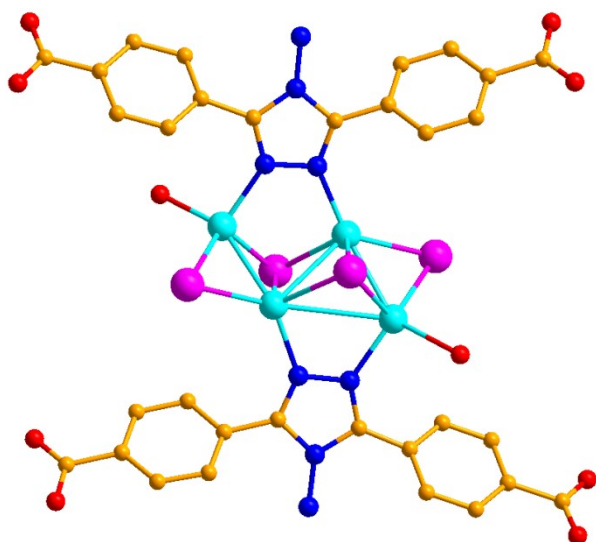

Fig. S4 view of the Cu<sub>4</sub>I<sub>4</sub> cluster

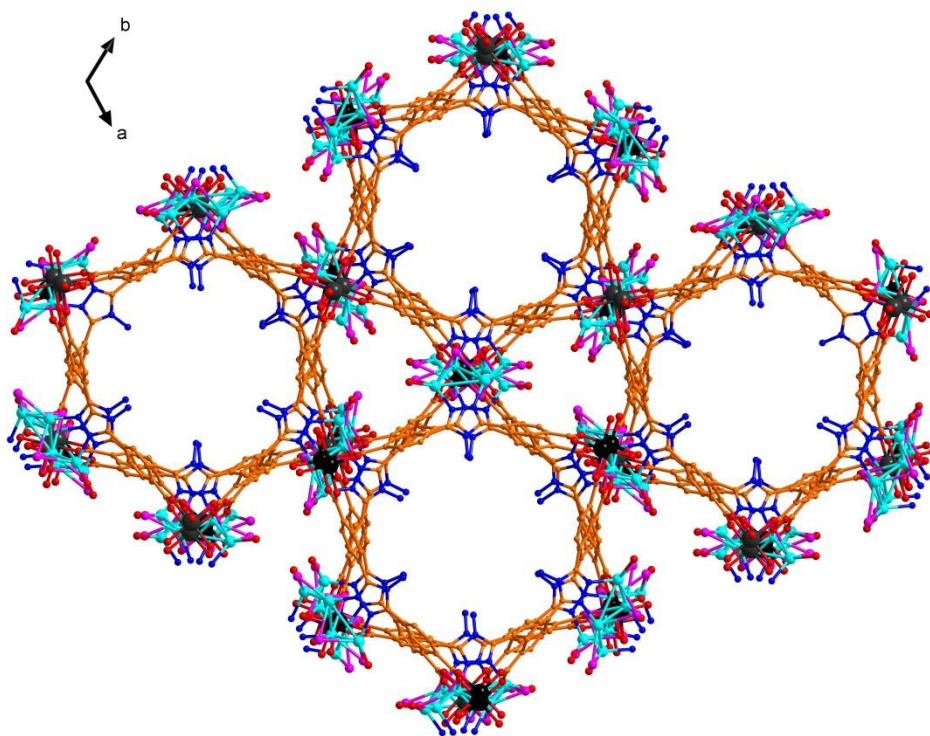

Fig S5. 3D packing mode of Cu-MOF

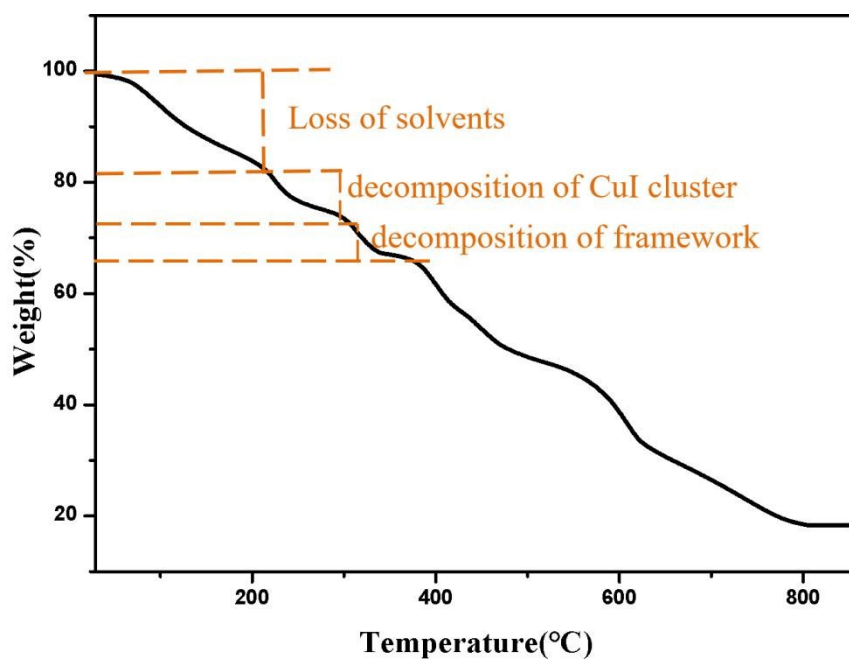

Fig. S6 Thermogravimetric analysis of Cu-MOF

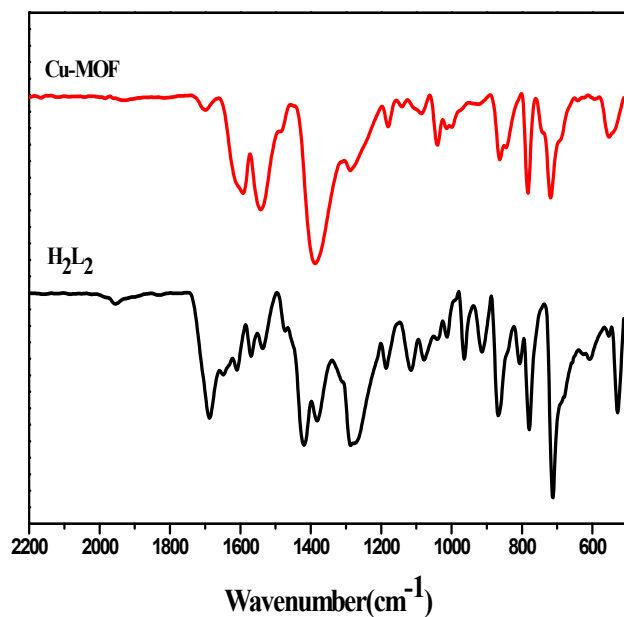

Fig. S7 Infrared contrast of Cu-MOF and triazole dicarboxylic acid ligand

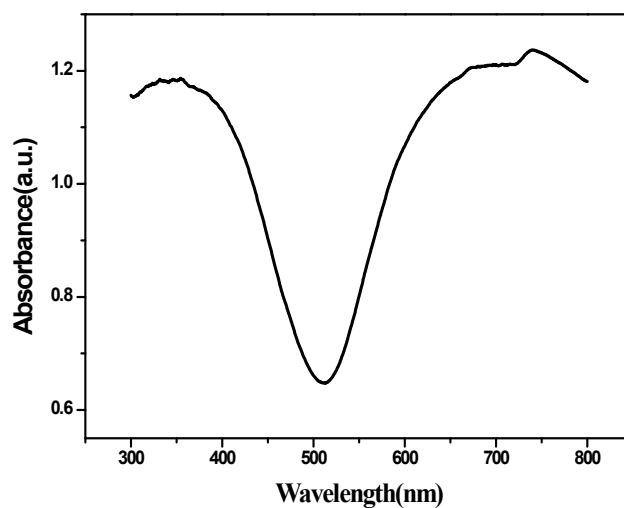

Fig. S8 Solid UV characterization of Cu-MOF

Table S4 Yields of cyclopropenyl carbonate produced under different reaction conditions

| Entry | Cu-MOF(% mol) | TBABr (% mol) | T(°C) | t(h) | Yield(%) |
|-------|---------------|---------------|-------|------|----------|
| 1     | 0.7           |               | 25    | 48   | 2.3      |
| 2     |               | 1.0           | 25    | 48   | 21       |
| 3     | 0.7           | 1.0           | 25    | 48   | 58.5     |
| 4     | 0.7           | 1.0           | 25    | 72   | 77.5     |
| 5     | 0.7           | 1.0           | 30    | 3    | 14.5     |
| 6     | 0.7           | 1.0           | 30    | 8    | 29.2     |

---

|    |     |     |    |    |      |
|----|-----|-----|----|----|------|
| 7  | 0.7 | 1.0 | 30 | 12 | 41   |
| 8  | 0.7 | 1.0 | 50 | 3  | 17.4 |
| 9  | 0.7 | 1.0 | 50 | 8  | 37.5 |
| 10 | 0.7 | 1.0 | 50 | 12 | 50   |
| 11 | 0.7 | 1.0 | 90 | 3  | 95   |
| 12 | 0.7 | 1.0 | 90 | 5  | 99   |

---

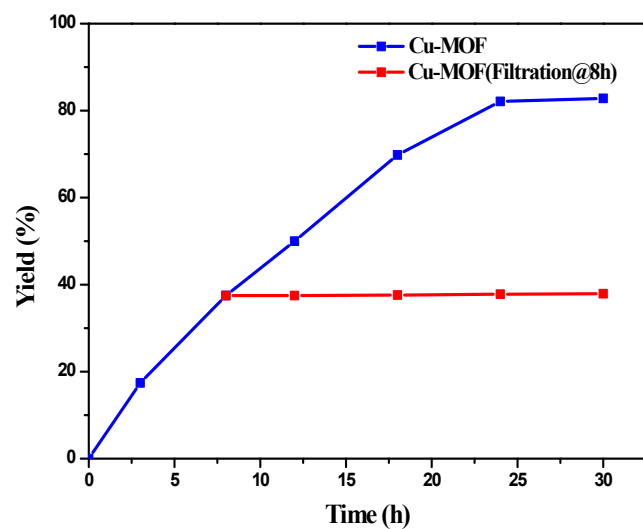

Fig. S9 Comparison of yield of Cu-MOF catalyst before and after 8h filtration

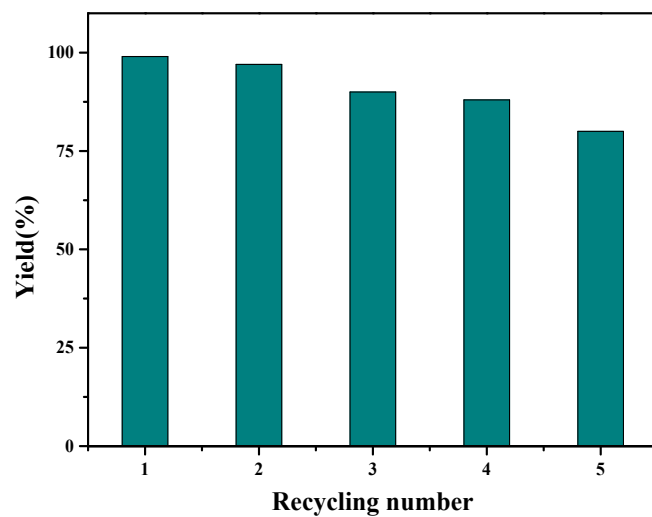

Fig. S10 Cu-MOF cycle number and corresponding yield

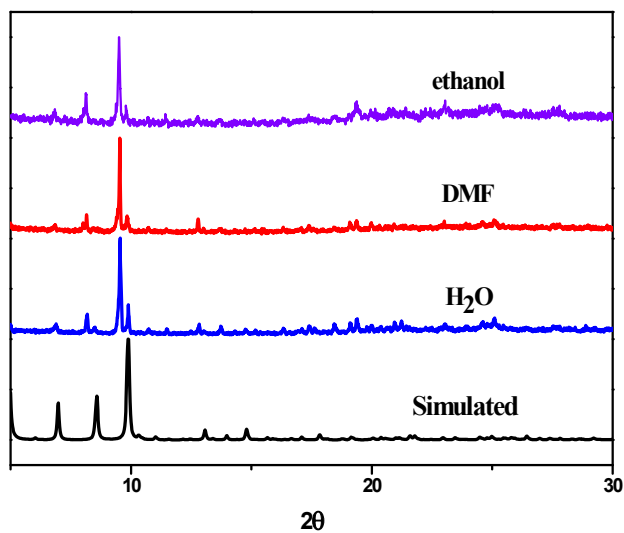

Fig. S11 X-ray powder diffraction characterization of Cu-MOF in different solvents

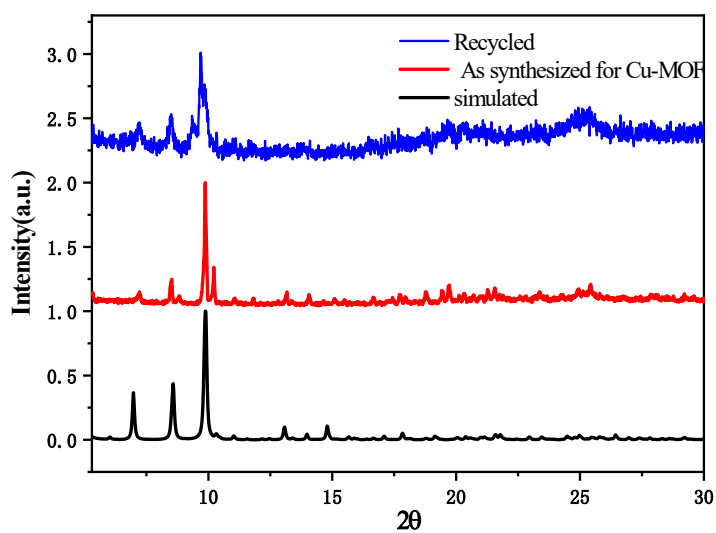

Fig. S12 Comparison of X-ray powder diffraction characterization before and after Cu-MOF participates in catalytic reaction

Table S5 Yield of CO<sub>2</sub> to oxazolidinone with 2-methyl-3-butyne-2-amine under different conditions

| Entry | Cu-MOF(mmol) | T(°C) | t(h) | Yield(%) |
|-------|--------------|-------|------|----------|
| 1     | 0.28         | 30    | 1    | 45.2     |
| 2     | 0.28         | 30    | 3    | 38.7     |
| 3     | 0.28         | 30    | 5    | 12.9     |

|    |      |    |   |      |
|----|------|----|---|------|
| 4  | 0.28 | 40 | 1 | 40.4 |
| 5  | 0.28 | 40 | 3 | 32.3 |
| 6  | 0.28 | 40 | 5 | 29   |
| 7  | 0.28 | 40 | 8 | 28.2 |
| 8  | 0.28 | 50 | 1 | 59.7 |
| 9  | 0.28 | 50 | 3 | 51.6 |
| 10 | 0.28 | 60 | 1 | 69.4 |
| 11 | 0.28 | 60 | 3 | 58.1 |

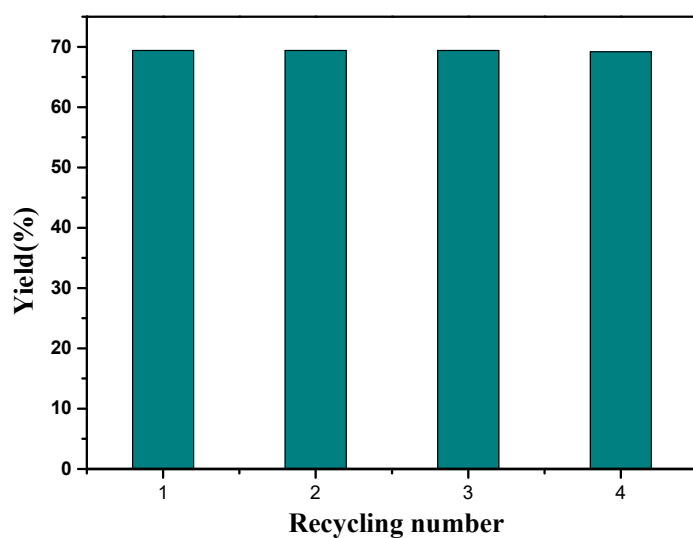

Fig. S13 Cu-MOF cycle number and corresponding yield

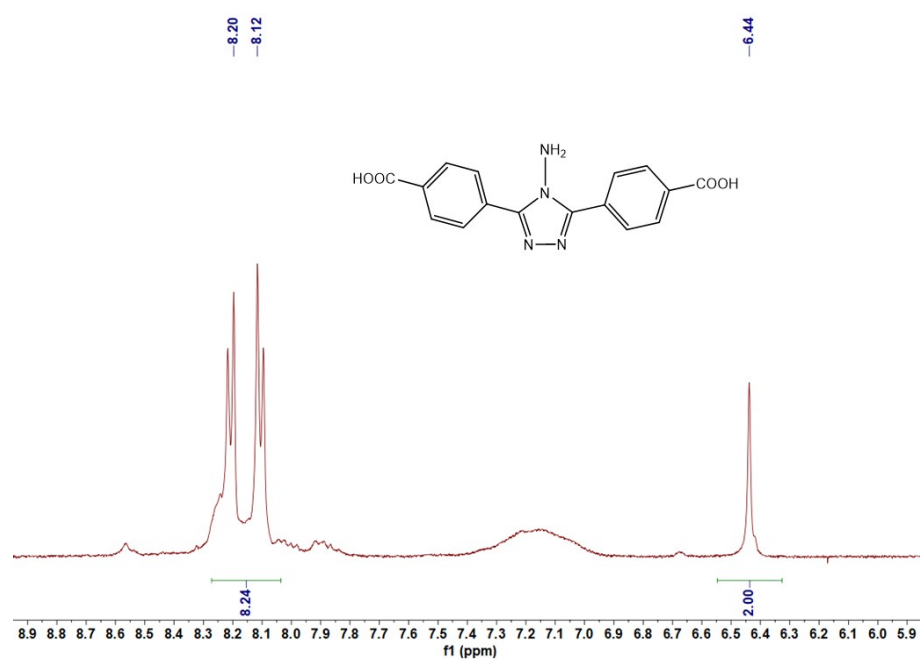

Fig. S14  $^1\text{H}$  NMR characterization of triazole dicarboxylic acid ligand

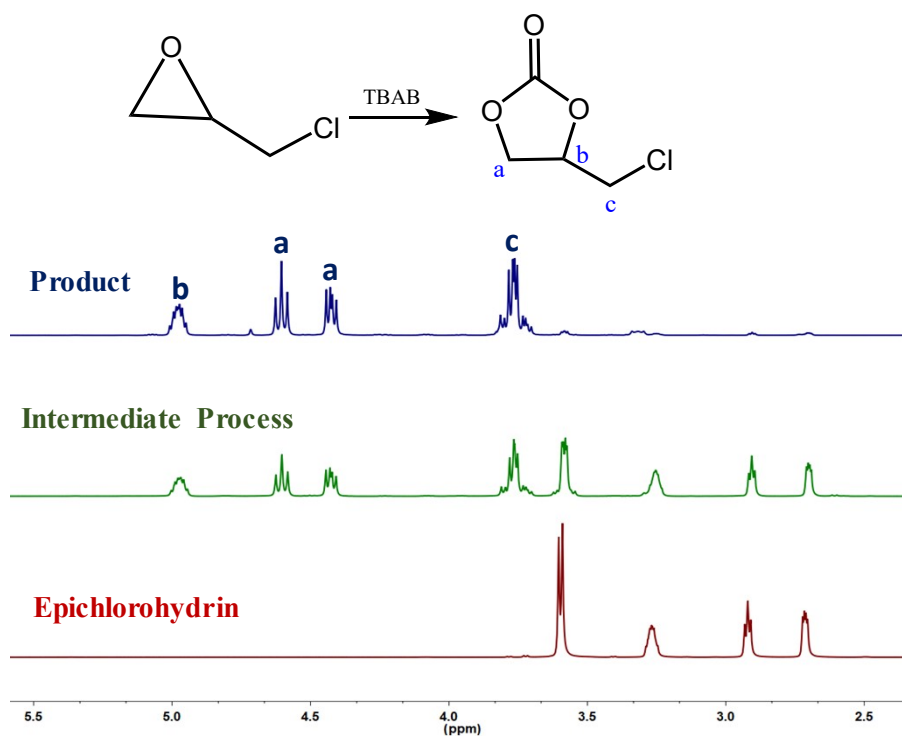

Fig. S15 X-ray powder diffraction characterization of Cu-MOF at different pH

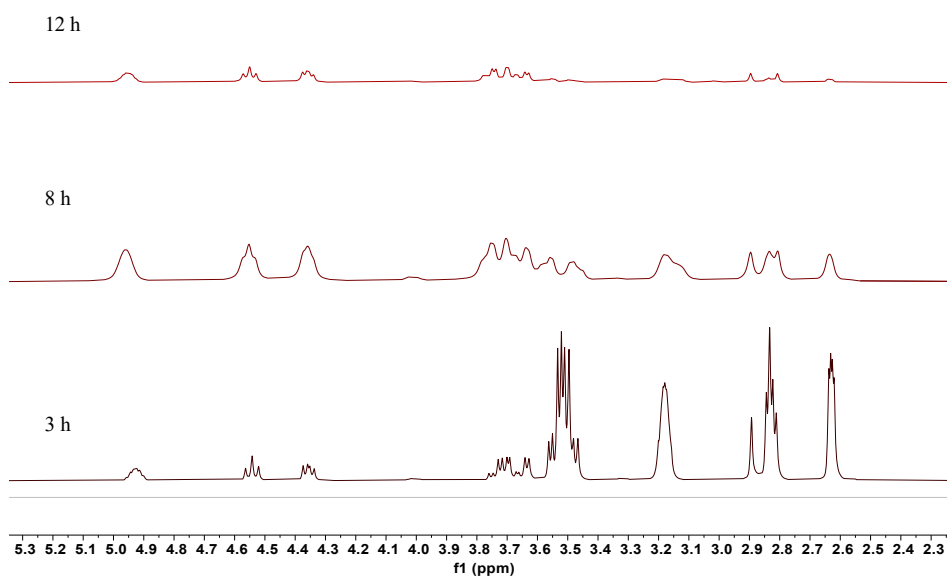

Fig. S16  $^1\text{H}$  NMR spectra of the conversion of epichlorohydrin at  $90\text{ }^\circ\text{C}$  for different times

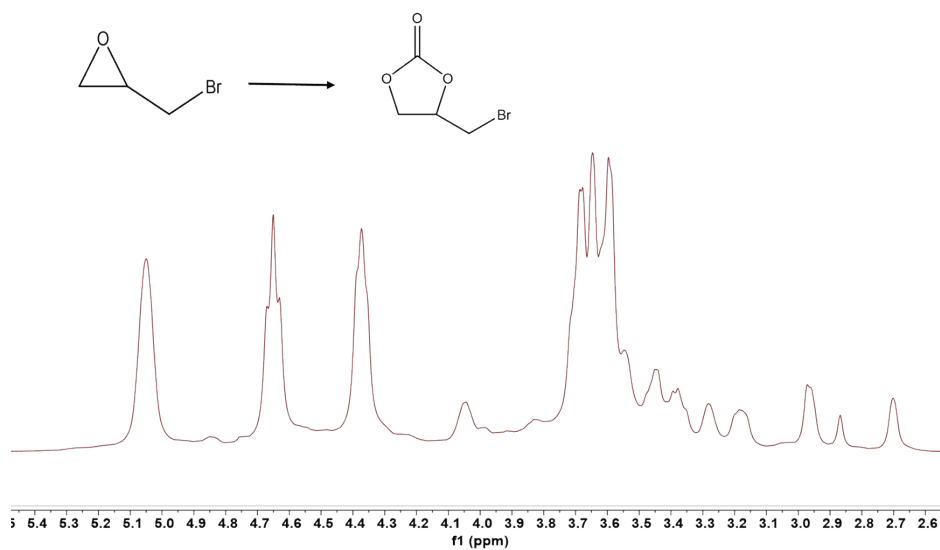

Fig. S17 Conversion of epoxypropyl bromide <sup>1</sup>H NMR spectrum

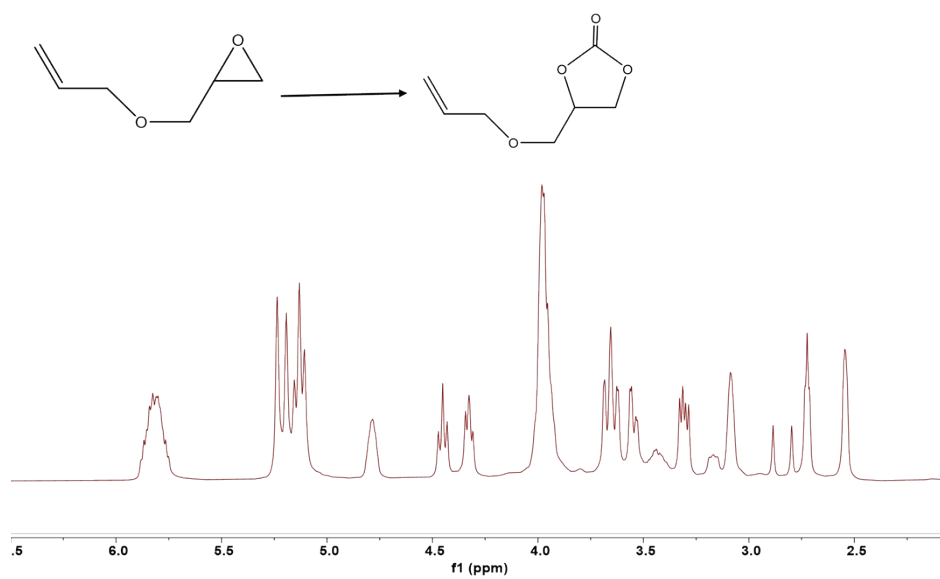

Fig. S18 Transformation of allyl glycidyl ether <sup>1</sup>H NMR spectrum



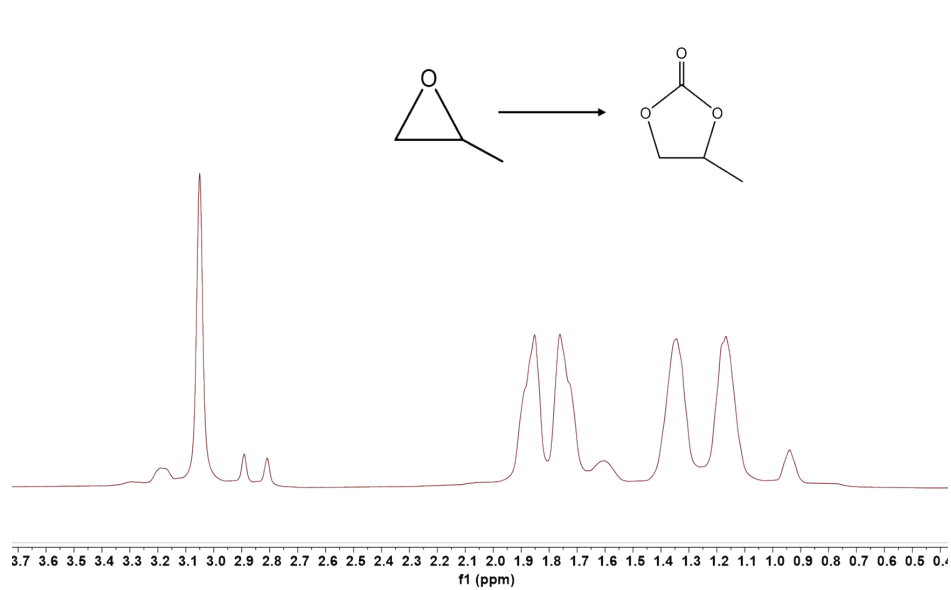

Fig. S19 Conversion of epoxypropane <sup>1</sup>H NMR spectrum

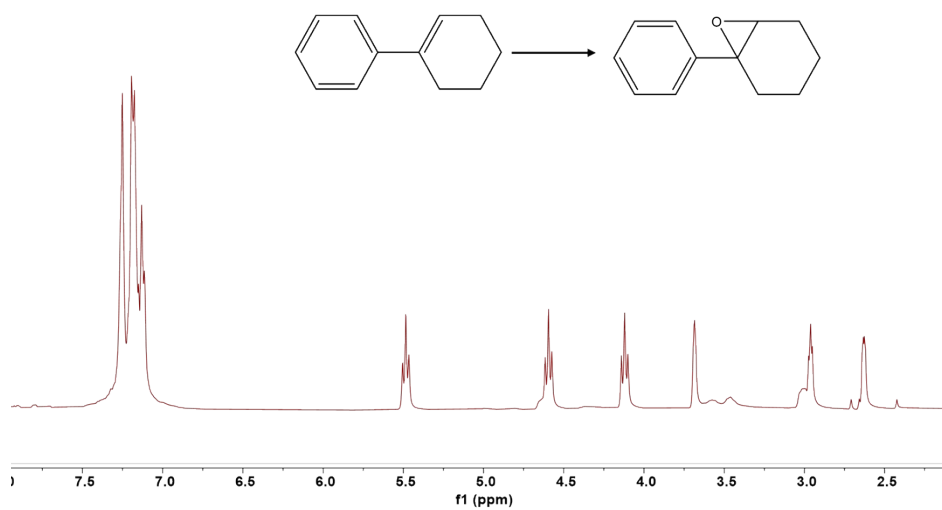

Fig. S20 Transformation of phenylcyclohexene <sup>1</sup>H NMR spectrum

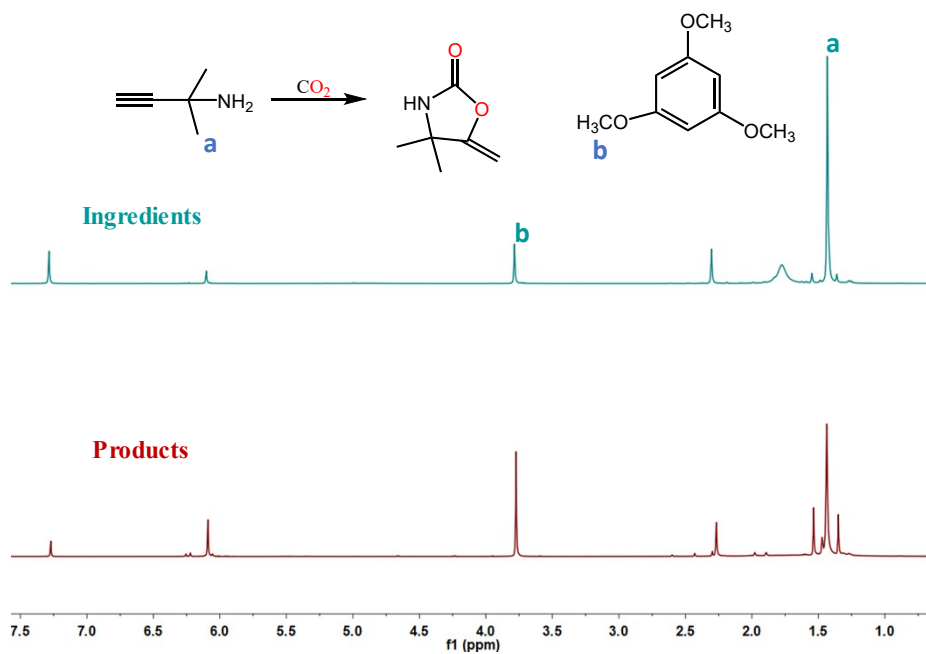

Fig. S21  $^1\text{H}$  NMR spectrum of the reaction of  $\text{CO}_2$  with endoalkynylamine

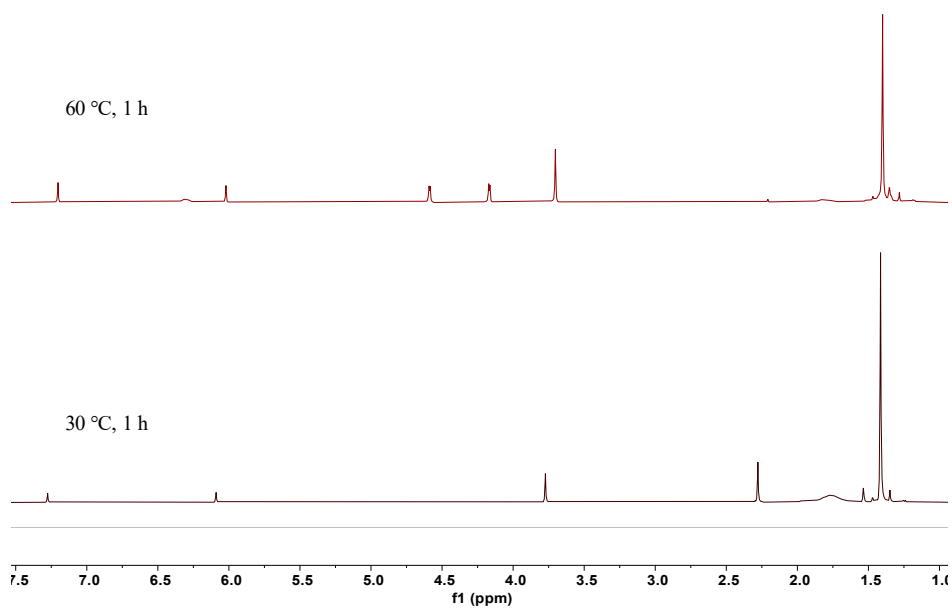

Fig. S22 Transformation of 2-methyl-3-butyne diamine at different temperatures  $^1\text{H}$  NMR spectrum

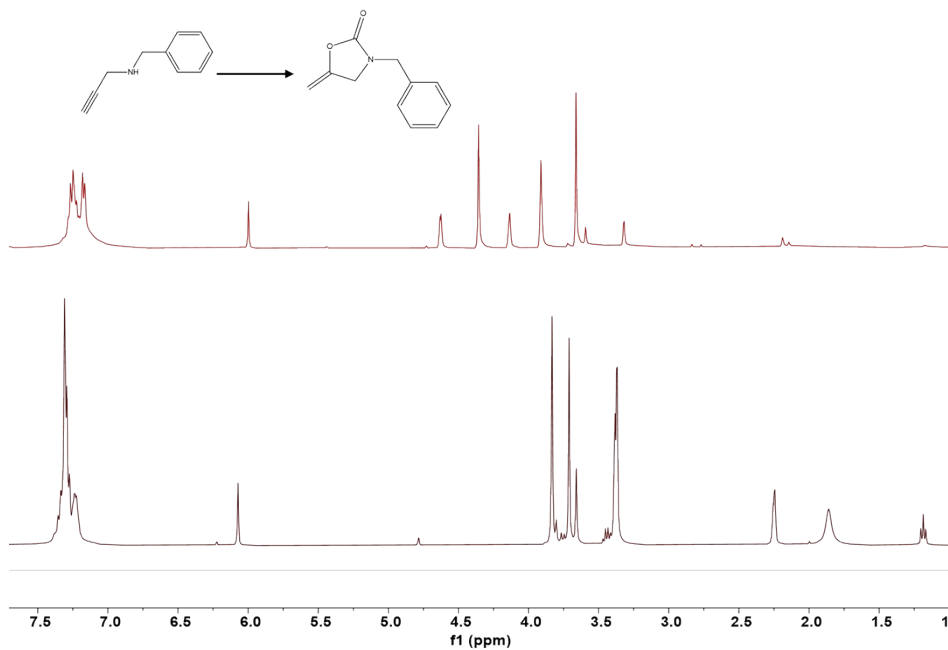

Fig. S23 Conversion of benzyl-2-propargylamine <sup>1</sup>H NMR spectrum

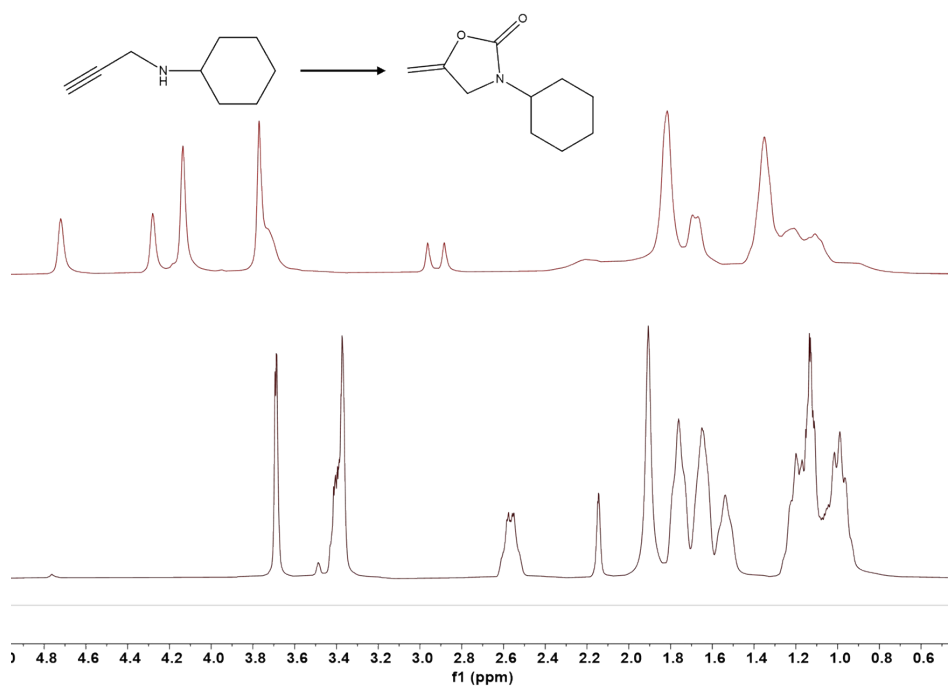

Fig. S24 Conversion of N-(prop-2-yn-1-yl)cyclohexanamine <sup>1</sup>H NMR spectrum

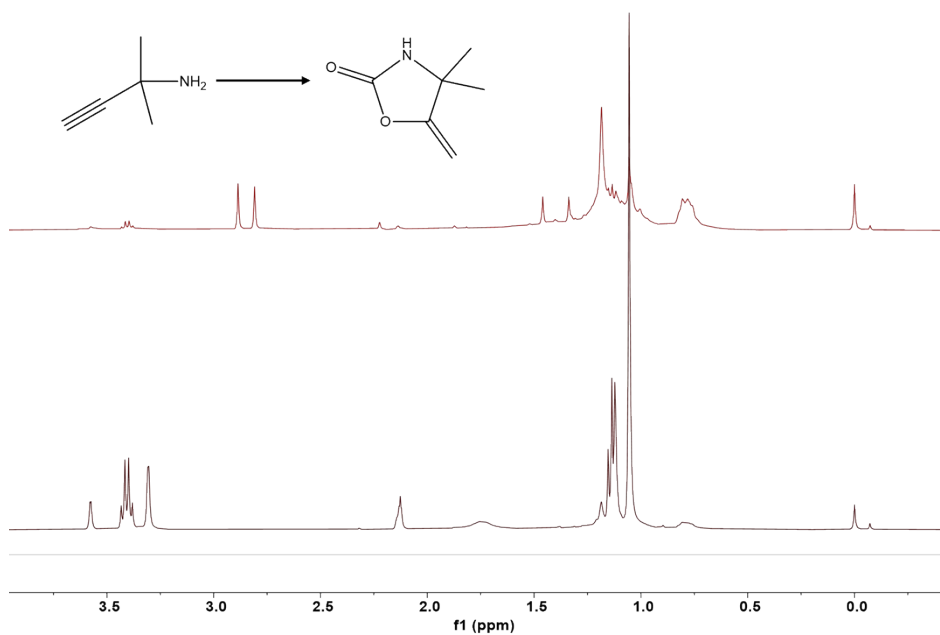

Fig. S25 Conversion of 2-methylbut-3-yn-2-amine <sup>1</sup>H NMR spectrum

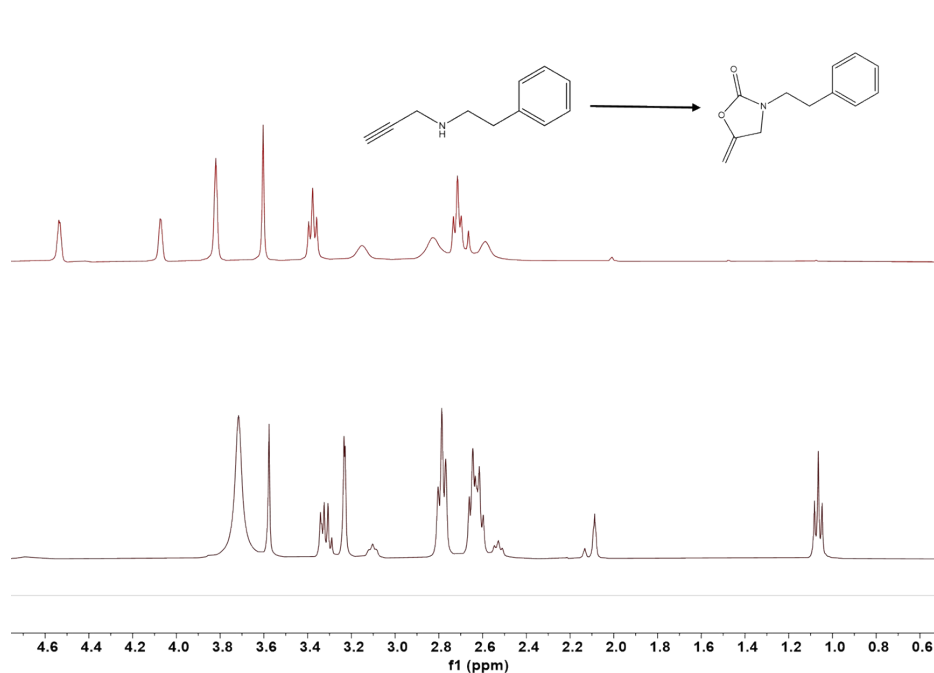

Fig. S26 Transformation of β-phenylethylamine <sup>1</sup>H NMR spectrum

Table S6 . The comparison of the TOF of other catalysts.

| Catalyst                 | Additive/Solvent | T(°C) | P (atm) | t(h) | TOF(h <sup>-1</sup> ) |
|--------------------------|------------------|-------|---------|------|-----------------------|
| This work <sup>[a]</sup> | --               | 60    | 1       | 1    | 15.8                  |
| SiO <sub>2</sub> -TBD    | --               | 90    | 80      | 21   | 0.84                  |
| CAT3                     | DMSO             | 60    | 1       | 10   | 0.79                  |

---

|                                      |                        |     |    |    |      |
|--------------------------------------|------------------------|-----|----|----|------|
| HPG@[Au]                             | H <sub>2</sub> O       | RT  | 15 | 48 | 1.92 |
| Fe <sub>4</sub> O <sub>3</sub> /[Au] | H <sub>2</sub> O       | RT  | 15 | 12 | 1.17 |
| D301R                                | --                     | 100 | 20 | 12 | 1.54 |
| TOS-Ag <sub>8</sub>                  | DBU/CH <sub>3</sub> CN | RT  | 1  | 24 | 4.13 |
| PS-MimFeCl <sub>4</sub>              | --                     | 100 | 80 | 18 | 2.72 |
| Ag-MOF-1                             | DBU/CH <sub>3</sub> CN | RT  | 1  | 24 | 0.56 |
| 2Gn[TEG][Au]                         | H <sub>2</sub> O       | RT  | 1  | 24 | 1.77 |
| ItBu                                 | iPrOH                  | 90  | 6  | 24 | 0.81 |
| Pd(OAc) <sub>2</sub>                 | Toluene                | 20  | 40 | 24 | 0.71 |
| TEOA                                 | --                     | 90  | 1  | 10 | 0.97 |
| ZnCl <sub>2</sub> (TBD) <sub>2</sub> | --                     | 60  | 1  | 12 | 1.6  |

---

TOF: Turnover frequency was evaluated at optimal conditions and calculated by the mole number of product per mole number of catalytic active of Cu per hour.

[a] 1.3 mmol substrate, 0.057mmol catalyst, 1 atm CO<sub>2</sub>, and solvent free. 1 h after the reaction, the yield determined by <sup>1</sup>H NMR with 1,3,5-Trimethoxybenzene as the internal standard.
